# Supplementary material for: Comparison of vertebroplasty and kyphoplasty for osteoporotic spinal fractures: An observational study using administrative data from England
Source: Research Square preprint supplement (doi:10.21203/rs.3.rs-1549733/v1), 2022-04-12
Supplement: Supplementary file 1 [file c20fe0806ba1d8215d8196cb.docx]

**Comparison of vertebroplasty and kyphoplasty for osteoporotic spinal fractures: An observational study using administrative data from England**

**Supplementary material Table S1: Procedure cods used to define repeat spinal surgery**

| **OPCS-4 codes** |
| --- |
| A441, A442, A443, A444, A445, A448, A449, A451, A452, A453, A454, A455, A456, A458, A459, A481, A482, A483, A484, A485, A486, A487, A488, A489, A491, A492, A493, A494, A498, A499, A511, A512, A513, A514, A518, A519, A521, A522, A528, A529, A53, A54, A551, A552, A553, A558, A559, A571, A572, A573, A574, A575, A576, A577, A578, A579, A735, U051, U052, U053, U054, U055, U058, U059, U131, U132, U133, U134, U135, U136, U138, U139, U141, U142, U143, U144, U148, U149, U211, U212, U213, U214, U215, U216, U217, U218, U219, U338, U339, U368, U369, V221, V222, V223, V224, V225, V226, V227, V228, V229, V231, V232, V233, V234, V235, V236, V237, V238, V239, V241, V242, V243, V244, V245, V248, V249, V251, V252, V253, V254, V255, V256, V257, V258, V259, V261, V262, V263, V264, V265, V266, V267, V268, V269, V27, V281, V282, V288, V289, V291, V292, V293, V294, V295, V296, V298, V299, V301, V302, V303, V304, V305, V306, V308, V309, V311, V312, V313, V314, V318, V319, V321, V322, V323, V324, V328, V329, V331, V332, V333, V334, V335, V336, V337, V338, V339, V341, V342, V343, V344, V345, V346, V347, V348, V349, V351, V352, V361, V362, V371, V372, V374, V375, V376, V377, V378, V379, V381, V382, V383, V384, V385, V386, V391, V392, V393, V394, V395, V396, V397, V401, V402, V403, V404, V405, V408, V409, V411, V412, V413, V414, V418, V419, V421, V422, V423, V424, V425, V426, V428, V429, V441, V442, V443, V444, V445, V448, V449, V451, V452, V453, V458, V459, V461, V462, V463, V464, V465, V468, V469, V471, V472, V473, V478, V479, V481, V482, V483, V484, V485, V486, V487, V488, V489, V524, V54, V543, V544, V671, V672, V678, V679, V681, V682, V688, V689, W361, W362, W363, W364, W365, W368, W369, W881, W888, W889, W903 |
